# Supplementary material for: Oral-Functioning Questionnaires in Patients with Head and Neck Cancer: A Scoping Review
Source: MDPI journal article supplement (doi:10.3390/jcm12123964), 2023-06-10
Supplement: s1 [file s1]

**Table S1.** Search strategy for relevant databases**PubMed 4200 (15 March 2021)**

| Search | PubMed Query – March 15, 2021                                                                                                                                                                                                                                                                                                                                                                                                                                                                                                                                                                                                                                                                                                                              | Results |
|--------|------------------------------------------------------------------------------------------------------------------------------------------------------------------------------------------------------------------------------------------------------------------------------------------------------------------------------------------------------------------------------------------------------------------------------------------------------------------------------------------------------------------------------------------------------------------------------------------------------------------------------------------------------------------------------------------------------------------------------------------------------------|---------|
| 4      | #1 AND #2 AND #3                                                                                                                                                                                                                                                                                                                                                                                                                                                                                                                                                                                                                                                                                                                                           | 4,200   |
| 3      | ((("Quality of Life"[Mesh] OR "Activities of Daily Living"[Mesh] OR "Health Status"[Mesh]) AND "Surveys and Questionnaires"[Mesh]) OR ((("quality of life"[tiab] OR life qualit*[tiab] OR living qualit*[tiab] OR "quality of living"[tiab]) AND ("assess*[tiab] OR "question*[tiab] OR "survey"[tiab] OR "instrument"[tiab] OR "index"[tiab])) OR "QLQ-HN35"[tiab] OR "QLQ-C30"[tiab] OR "H&N35"[tiab] OR "UWQOLQ"[tiab] OR "Neck Survey"[tiab] OR "FACT-H&N"[tiab] OR "oral function*[tiab] OR "masticatory function*" OR "swallow*[tiab] OR "chew*[tiab]                                                                                                                                                                                                | 299,735 |
| 2      | "Radiotherapy"[Mesh] OR "radiotherapy"[Subheading] OR "Radiosurgery"[Mesh] OR "radiotherap*[tiab] OR "radiati*[tiab] OR "radiosurg*[tiab] OR "irradiati*[tiab] OR "x ray therap*[tiab] OR "radioimmunotherap*[tiab] OR "immunoradiotherap*[tiab] OR "intensity modulated therap*[tiab] OR "Volumetric Modulated Arc Therap*[tiab] OR "Intensity Modulated Arc Therap*[tiab] OR "Helical Tomotherap*[tiab] OR "IMRT"[tiab]                                                                                                                                                                                                                                                                                                                                  | 762,050 |
| 1      | "Head and Neck Neoplasms"[Mesh] OR (cancer[sb] AND ("esophag*[tiab] OR "face"[tiab] OR "facial*[tiab] OR "gingiva*[tiab] OR "head"[tiab] OR "hypopharyn*[tiab] OR "jaw"[tiab] OR "jaws"[tiab] OR "laryn*[tiab] OR "lip"[tiab] OR "lips"[tiab] OR "mandib*[tiab] OR "mouth"[tiab] OR "nasopharyn*[tiab] OR "neck"[tiab] OR "nose"[tiab] OR "oesophag*[tiab] OR "oral*[tiab] OR "oropharyn*[tiab] OR "otorhinolaryn*[tiab] OR "palatal*[tiab] OR "palate"[tiab] OR "palatum"[tiab] OR "paranasal*[tiab] OR "parathy*[tiab] OR "paroti*[tiab] OR "pharyn*[tiab] OR "salivar*[tiab] OR "sublingual*[tiab] OR "submandib*[tiab] OR "throat"[tiab] OR "thyroid*[tiab] OR "tongue"[tiab] OR "tonsil*[tiab] OR "uadt"[tiab] OR "upper aerodigestive tract"[tiab])) | 770,021 |

**Embase 5867, 3744 excluding conference abstracts (15 March 2021)**

| Search | Embase Query – March 15, 2021                                                                                                                                                                                                                                                                                                                                                                                                                                                                                     | Results |
|--------|-------------------------------------------------------------------------------------------------------------------------------------------------------------------------------------------------------------------------------------------------------------------------------------------------------------------------------------------------------------------------------------------------------------------------------------------------------------------------------------------------------------------|---------|
| #5     | #4 NOT 'conference abstract'/it                                                                                                                                                                                                                                                                                                                                                                                                                                                                                   | 3744    |
| #4     | #1 AND #2 AND #3                                                                                                                                                                                                                                                                                                                                                                                                                                                                                                  | 5867    |
| #3     | 'quality of life questionnaire'/exp OR (('quality of life'/exp OR 'health status'/exp) AND ('health survey'/exp OR 'questionnaire'/exp)) OR (((('quality of life' OR 'qol') NEAR/3 ('assess*' OR 'question*' OR 'survey' OR 'instrument' OR 'index')):ti,ab,kw) OR 'qlq-hn35':ti,ab,kw OR 'qlq-c30':ti,ab,kw OR 'h&n35':ti,ab,kw OR 'uwqolq':ti,ab,kw OR 'neck survey':ti,ab,kw OR 'fact-h&n':ti,ab,kw OR 'oral function*':ti,ab,kw OR 'masticatory function':ti,ab,kw OR 'swallow*':ti,ab,kw OR 'chew*':ti,ab,kw | 253572  |
| #2     | 'radiotherapy'/exp OR 'irradiati*':ti,ab,kw OR 'radiat*':ti,ab,kw OR 'radiotherap*':ti,ab,kw OR 'radiohypophysectom*':ti,ab,kw OR 'radiotreatment*':ti,ab,kw OR 'radioimmunotherap*':ti,ab,kw OR 'immunoradiotherap*':ti,ab,kw OR 'imrt':ti,ab,kw OR 'helical                                                                                                                                                                                                                                                     | 1105149 |

|    |                                                                                                                                                                                                                                                                                                                                                                                                                                                                                                                                                                                                                                                                                                                                                                                                                                                                                                                                                                                                                                                                                                                                                                                                                                                                                                                                                                                                                                                                                                                                                                                          |        |
|----|------------------------------------------------------------------------------------------------------------------------------------------------------------------------------------------------------------------------------------------------------------------------------------------------------------------------------------------------------------------------------------------------------------------------------------------------------------------------------------------------------------------------------------------------------------------------------------------------------------------------------------------------------------------------------------------------------------------------------------------------------------------------------------------------------------------------------------------------------------------------------------------------------------------------------------------------------------------------------------------------------------------------------------------------------------------------------------------------------------------------------------------------------------------------------------------------------------------------------------------------------------------------------------------------------------------------------------------------------------------------------------------------------------------------------------------------------------------------------------------------------------------------------------------------------------------------------------------|--------|
|    | thomotherap*:ti,ab,kw OR (((('bioradiant' OR 'bucky' OR 'radio' OR 'roentgen' OR 'rontgen' OR 'x ray' OR 'volumetric modulated' OR 'intensity modulated') NEAR/3 ('therap*' OR 'radiotherap*' OR 'treatment*'))):ti,ab,kw)                                                                                                                                                                                                                                                                                                                                                                                                                                                                                                                                                                                                                                                                                                                                                                                                                                                                                                                                                                                                                                                                                                                                                                                                                                                                                                                                                               |        |
| #1 | 'head and neck tumor'/exp OR 'hnscc':ti,ab,kw OR 'scchn':ti,ab,kw OR ((('neoplasm'/exp OR 'adenoma*':ti,ab,kw OR 'anticarcinogen*':ti,ab,kw OR 'blastoma*':ti,ab,kw OR 'cancer*':ti,ab,kw OR 'carcinogen*':ti,ab,kw OR 'carcinom*':ti,ab,kw OR 'carcinosarcoma*':ti,ab,kw OR 'chordoma*':ti,ab,kw OR 'malignan*':ti,ab,kw OR 'melanom*':ti,ab,kw OR 'mesenchymoma*':ti,ab,kw OR 'metasta*':ti,ab,kw OR 'neoplas*':ti,ab,kw OR 'neuroma*':ti,ab,kw OR 'nsccl':ti,ab,kw OR 'oncogen*':ti,ab,kw OR 'oncolog*':ti,ab,kw OR 'paraneoplastic':ti,ab,kw OR 'plasmacytoma*':ti,ab,kw OR 'precancerous':ti,ab,kw OR 'sarcoma*':ti,ab,kw OR 'teratocarcinoma*':ti,ab,kw OR 'teratoma*':ti,ab,kw OR 'tumor*':ti,ab,kw OR 'tumour*':ti,ab,kw) AND ('esophag*':ti,ab,kw OR 'face':ti,ab,kw OR 'facial*':ti,ab,kw OR 'gingiva*':ti,ab,kw OR 'head':ti,ab,kw OR 'hypopharynx*':ti,ab,kw OR 'jaw':ti,ab,kw OR 'jaws':ti,ab,kw OR 'larynx*':ti,ab,kw OR 'lip':ti,ab,kw OR 'lips':ti,ab,kw OR 'mandib*':ti,ab,kw OR 'mouth':ti,ab,kw OR 'nasopharynx*':ti,ab,kw OR 'neck':ti,ab,kw OR 'nose':ti,ab,kw OR 'oesophag*':ti,ab,kw OR 'oral*':ti,ab,kw OR 'oropharynx*':ti,ab,kw OR 'otorhinolarynx*':ti,ab,kw OR 'palatal*':ti,ab,kw OR 'palate':ti,ab,kw OR 'palatum':ti,ab,kw OR 'paranasal*':ti,ab,kw OR 'parathyroid*':ti,ab,kw OR 'paroti*':ti,ab,kw OR 'pharynx*':ti,ab,kw OR 'salivar*':ti,ab,kw OR 'sublingual*':ti,ab,kw OR 'submandib*':ti,ab,kw OR 'throat':ti,ab,kw OR 'thyroid*':ti,ab,kw OR 'tongue':ti,ab,kw OR 'tonsil*':ti,ab,kw OR 'uadt':ti,ab,kw OR 'upper aerodigestive tract':ti,ab,kw)) | 920335 |

#### Web of Science 2913 (15 March 2021)

| Search | Web of Science Query – March 15, 2021                                                                                                                                                                                                                                                                                                                                      | Results |
|--------|----------------------------------------------------------------------------------------------------------------------------------------------------------------------------------------------------------------------------------------------------------------------------------------------------------------------------------------------------------------------------|---------|
| #4     | #1 AND #2 AND #3                                                                                                                                                                                                                                                                                                                                                           | 2913    |
|        | <i>Indexes=SCI-EXPANDED, SSCI, A&amp;HCI, ESCI Timespan=All years</i>                                                                                                                                                                                                                                                                                                      |         |
| #3     | TS=(((“quality of life” OR “QOL”) NEAR/3 (assess* OR question* OR survey OR instrument OR index) ) OR “QLQ-HN35” OR “QLQ-C30” OR “H&N35” OR “UWQOLQ” OR “Neck Survey” OR “FACT-H&N” OR “oral function*” OR “masticatory function” OR “swallow*” OR “chew*”)                                                                                                                | 110412  |
|        | <i>Indexes=SCI-EXPANDED, SSCI, A&amp;HCI, ESCI Timespan=All years</i>                                                                                                                                                                                                                                                                                                      |         |
| #2     | TS=(“irradiat*” OR “radiat*” OR “radiotherap*” OR “radiohypophysectom*” OR “radiotreatment*” OR “radioimmunotherap*” OR “immunoradiotherap*” OR “IMRT” OR “helical thomotherap*” OR ((“bioradiant” OR “bucky” OR “radio” OR “roentgen” OR “rontgen” OR “x ray” OR “volumetric modulated” OR “intensity modulated”) NEAR/3 (“therap*” OR “radiotherap*” OR “treatment*”) )) | 1505656 |
|        | <i>Indexes=SCI-EXPANDED, SSCI, A&amp;HCI, ESCI Timespan=All years</i>                                                                                                                                                                                                                                                                                                      |         |
| #1     | TS=(“hnscc” OR “scchn” OR ((“adenoma*” OR “anticarcinogen*” OR “blastoma*” OR “cancer*” OR “carcinogen*” OR “carcinom*” OR “carcinosarcoma*” OR “chordoma*” OR “malignan*” OR “melanom*” OR “mesenchymoma*” OR “metasta*” OR “neoplas*” OR “neuroma*” OR “nsccl” OR “oncogen*” OR “oncolog*” OR “paraneoplastic” OR                                                        | 507264  |

|  |                                                                                                                                                                                                                                                                                                                                                                                                                                                                                                                                                                                                                                                                                                                                                                                                                         |  |
|--|-------------------------------------------------------------------------------------------------------------------------------------------------------------------------------------------------------------------------------------------------------------------------------------------------------------------------------------------------------------------------------------------------------------------------------------------------------------------------------------------------------------------------------------------------------------------------------------------------------------------------------------------------------------------------------------------------------------------------------------------------------------------------------------------------------------------------|--|
|  | <p>             "plasmacytoma*" OR "precancerous" OR "sarcoma*" OR<br/>             "teratocarcinoma*" OR "teratoma*" OR "tumor*" OR "tumour*") AND<br/>             ("esophag*" OR "face" OR "facial*" OR "gingiva*" OR "head" OR<br/>             "hypopharynx*" OR "jaw" OR "jaws" OR "larynx*" OR "lip" OR "lips" OR<br/>             "mandib*" OR "mouth" OR "nasopharynx*" OR "neck" OR "nose" OR<br/>             "oesophag*" OR "oral*" OR "oropharynx*" OR "otorhinolarynx*" OR<br/>             "palatal*" OR "palate" OR "palatum" OR "paranasal*" OR "parathyroid*" OR<br/>             "parotid*" OR "pharynx*" OR "salivary*" OR "sublingual*" OR "submandibular*" OR<br/>             "throat" OR "thyroid*" OR "tongue" OR "tonsil*" OR "uadt" OR "upper<br/>             aerodigestive tract" ) ) </p> |  |
|  | <p> <i>Indexes=SCI-EXPANDED, SSCI, A&amp;HCI, ESCI Timespan=All years</i> </p>                                                                                                                                                                                                                                                                                                                                                                                                                                                                                                                                                                                                                                                                                                                                          |  |

**Cochrane 1069 (15 March 2021)**

| Search | Cochrane Query – March 15, 2021                                                                                                                                                                                                                                                                                                                                                                                                                                                                                                                                                                                                                                                                                                                                                                                                    | Results |
|--------|------------------------------------------------------------------------------------------------------------------------------------------------------------------------------------------------------------------------------------------------------------------------------------------------------------------------------------------------------------------------------------------------------------------------------------------------------------------------------------------------------------------------------------------------------------------------------------------------------------------------------------------------------------------------------------------------------------------------------------------------------------------------------------------------------------------------------------|---------|
| #1     | (hnscc OR scchn OR ((adenoma* OR anticarcinogen* OR blastoma* OR cancer* OR carcinogen* OR carcinom* OR carcinosarcoma* OR chordoma* OR malignan* OR melanom* OR mesenchymoma* OR metastas* OR neoplas* OR neuroma* OR nsclc OR oncogen* OR oncolog* OR paraneoplastic OR plasmacytoma* OR precancerous OR sarcoma* OR teratocarcinoma* OR teratoma* OR tumor* OR tumour*) AND (esophag* OR face OR facial* OR gingiva* OR head OR hypopharynx* OR jaw OR jaws OR larynx* OR lip OR lips OR mandib* OR mouth OR nasopharynx* OR neck OR nose OR oesophag* OR oral* OR oropharynx* OR otorhinolarynx* OR palatal* OR palate OR palatum OR paranasal* OR parathyroid* OR parotid* OR pharynx* OR salivary* OR sublingual* OR submandib* OR throat OR thyroid* OR tongue OR tonsil* OR uadt OR upper aerodigestive tract)))):ti,ab,kw | 50135   |
| #2     | (irradiati* OR radiat* OR radiotherap* OR radiohypophysectom* OR radiotreatment* OR radioimmunotherap* OR immunoradiotherap* OR "IMRT" OR ("helical" NEAR/2 thomotherap*) OR ("bioradiant" OR "bucky" OR "radio" OR "roentgen" OR "rontgen" OR "x ray" OR "volumetric modulated" OR "intensity modulated") NEAR/3 (therap* OR radiotherap* OR treatment*))):ti,ab,kw                                                                                                                                                                                                                                                                                                                                                                                                                                                               | 52055   |
| #3     | (((("quality of life" OR "QOL") NEAR/3 (assess* OR question* OR "survey" OR "instrument" OR "index")) OR "QLQ HN35" OR "QLQ C30" OR "H&N35" OR "UWQOLQ" OR "Neck Survey" OR "FACT H&N" OR ("oral" NEXT function*) OR ("masticatory" NEXT function*) OR swallow* OR chew*))):ti,ab,kw                                                                                                                                                                                                                                                                                                                                                                                                                                                                                                                                               | 41293   |
| #4     | #1 AND #2 AND #3                                                                                                                                                                                                                                                                                                                                                                                                                                                                                                                                                                                                                                                                                                                                                                                                                   | 1069    |
